# Supplementary material
Source: publisher figshare collection journal article supplement (https://acs.figshare.com/ndownloader/files/14244449)
Supplement: Supplementary file 1 [file 14244449]

**Supporting Information-Methane (CH<sub>4</sub>) wettability of clay coated quartz at reservoir conditions**

Bin Pan<sup>a</sup>, Franca Jones<sup>b</sup>, Zhaoqin Huang<sup>c</sup>, Yongfei Yang<sup>c</sup>, Yajun Li<sup>d</sup>, Seyed Hossein Hejazi<sup>a</sup>,  
Stefan Iglauer<sup>e</sup>

<sup>a</sup>*Department of Chemical and Petroleum Engineering, University of Calgary, Calgary, Canada, T2N 1N4, [bin.pan1@ucalgary.ca](mailto:bin.pan1@ucalgary.ca); [shhejazi@ucalgary.ca](mailto:shhejazi@ucalgary.ca)*

<sup>b</sup>*Department of Chemistry, Nanochemistry Research Institute, Curtin University, Perth WA 6845, Australia, PO Box U1987, [F.Jones@curtin.edu.au](mailto:F.Jones@curtin.edu.au)*

<sup>c</sup>*School of Petroleum Engineering, China University of Petroleum (East China), No. 66, Changjiang West Road, Qingdao, China, 266580, [huangzhqin@upc.edu.cn](mailto:huangzhqin@upc.edu.cn); [yangyongfei@upc.edu.cn](mailto:yangyongfei@upc.edu.cn)*

<sup>d</sup>*Key Laboratory of Unconventional Oil & Gas Development (China University of Petroleum (East China)), Ministry of Education, Qingdao, 266580, P.R. China, [liyajun@upc.edu.cn](mailto:liyajun@upc.edu.cn)*

<sup>e</sup>*School of Engineering, Edith Cowan University, 270 Joondalup Drive, Joondalup, Australia, [s.iglauer@ecu.edu.au](mailto:s.iglauer@ecu.edu.au)*

\*corresponding authors ([yangyongfei@upc.edu.cn](mailto:yangyongfei@upc.edu.cn); [liyajun@upc.edu.cn](mailto:liyajun@upc.edu.cn); [shhejazi@ucalgary.ca](mailto:shhejazi@ucalgary.ca); [s.iglauer@ecu.edu.au](mailto:s.iglauer@ecu.edu.au))

3D topography

Deflection signal

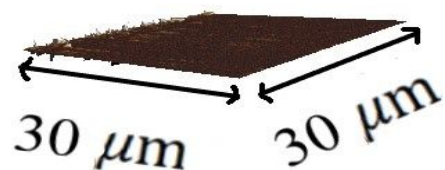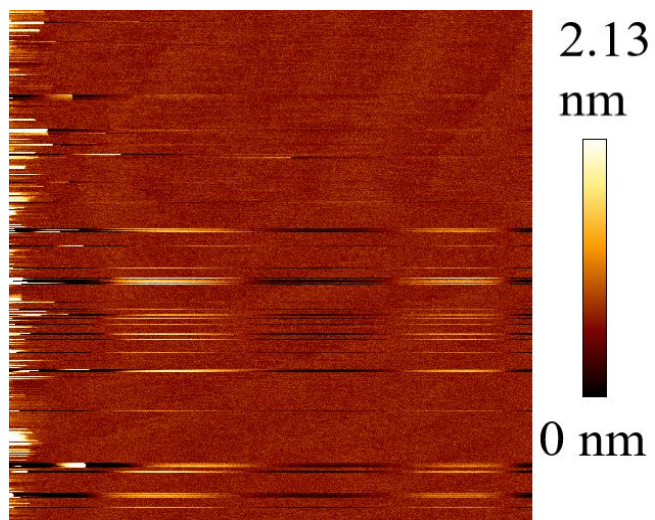

RMS = 483.7 pm

(a)

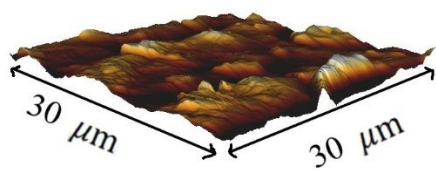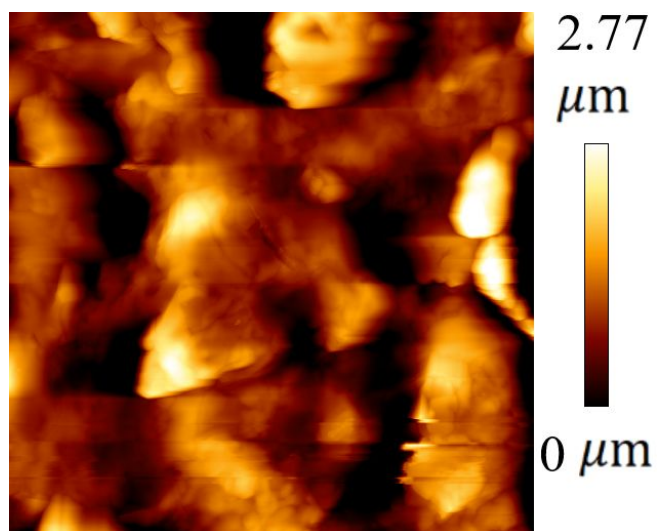

RMS = 629.8 nm

(b)

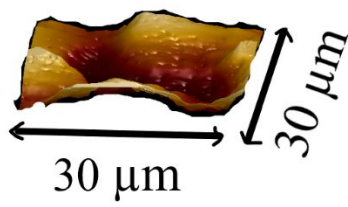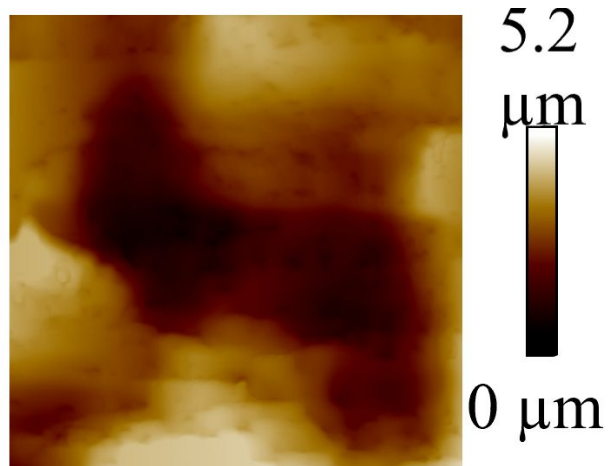

RMS = 863 nm

(c)

**SI-Figure 1.** Atomic Force Microscopy (AFM) images of a) clean, b) kaolinite coated and c) montmorillonite coated quartz. Note that the poor signal is due to surface properties caused by coating.

**Original**

**Binary**

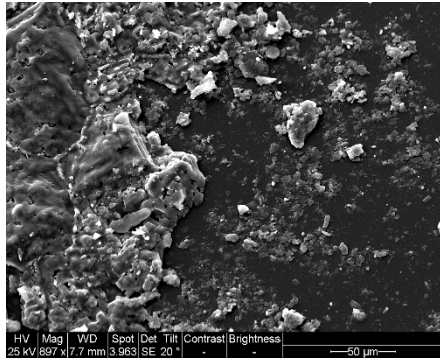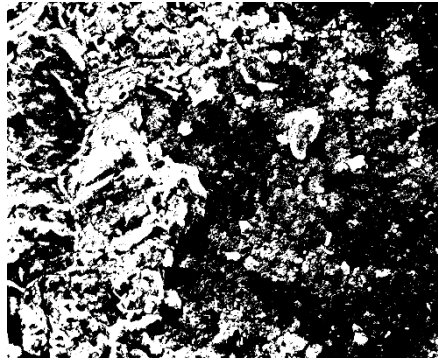

(a) Kaolinite coverage = 36.37%

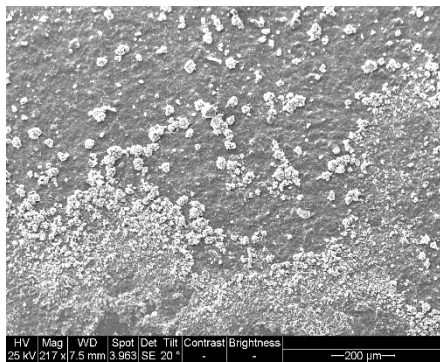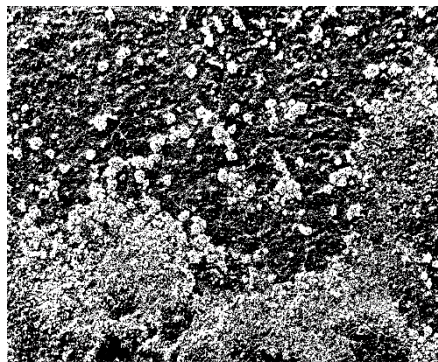

(b) Kaolinite coverage = 39.12%

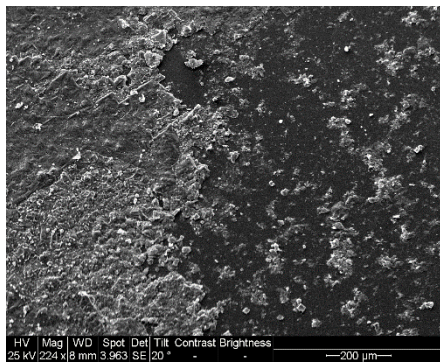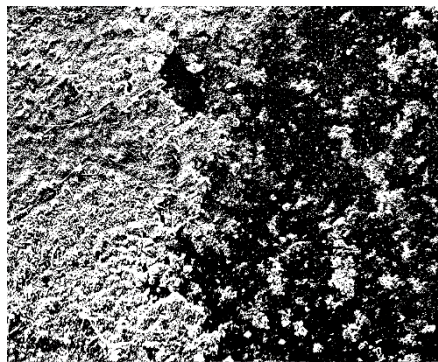

(c) Kaolinite coverage = 36.96%



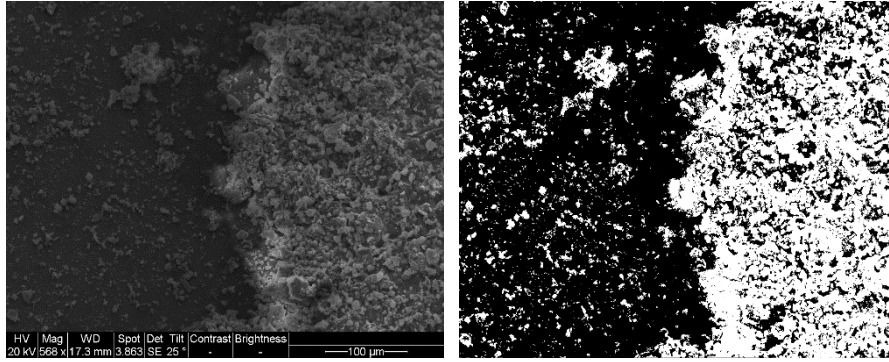

(d) Montmorillonite coverage = 38.17%

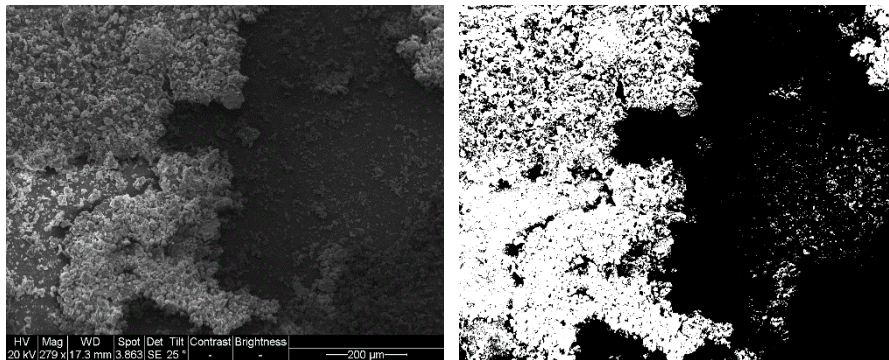

(e) Montmorillonite coverage = 38.9%

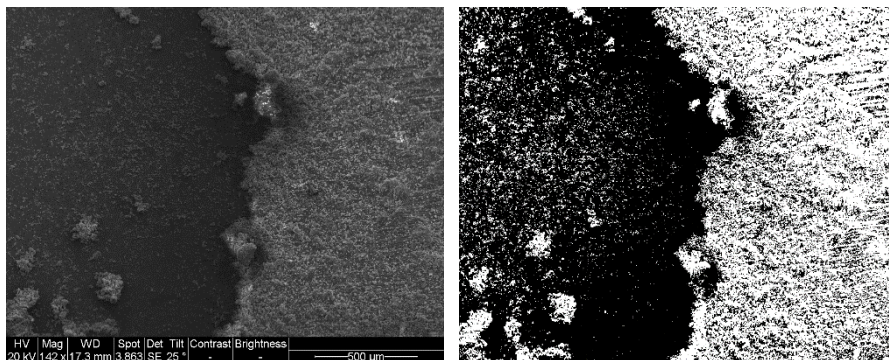

(f) Montmorillonite coverage = 39.99%

**SI-Figure 2.** Random three areas of original and binary SEM images of kaolinite (a-c) and montmorillonite (d-f) coating. The light color is clay particle and the dark color is quartz

substrate. The threshold was determined by the average RGB based on the whole area of the chosen image.

**SI-Table 1.** The total salinities of clay suspensions in DI water and 1.5 wt% NaCl brine at room temperature (i.e.  $20 \pm 1^\circ\text{C}$ )

| Samples                              | Salinity [wt%] |               |               | Mean  |
|--------------------------------------|----------------|---------------|---------------|-------|
|                                      | Measurement 1  | Measurement 2 | Measurement 3 |       |
| DI water                             | 0.0058         | 0.0058        | 0.0058        | 0.006 |
| 1.5 wt% NaCl                         | 1.5012         | 1.5           | 1.4999        | 1.5   |
| 2 wt% Kaolinite in DI water          | 0.01           | 0.01          | 0.01          | 0.01  |
| 2 wt% Montmorillonite in DI water    | 0.0061         | 0.006         | 0.006         | 0.006 |
| 2 wt% Kaolinite in 1.5 wt% NaCl      | 1.5011         | 1.5012        | 1.5           | 1.5   |
| 2 wt% Montmorillonite + 1.5 wt% NaCl | 1.5012         | 1.4999        | 1.5011        | 1.5   |

**SI-Table 2.** Advancing contact angles for various systems at 10 MPa and  $50^\circ\text{C}$ .

| Systems                                                                 | Advancing contact angle [ $^\circ$ ] |               |               | Mean |
|-------------------------------------------------------------------------|--------------------------------------|---------------|---------------|------|
|                                                                         | Measurement 1                        | Measurement 2 | Measurement 3 |      |
| 5 wt% NaCl-CH <sub>4</sub> -kaolinite coated quartz                     | 22                                   | 23            | 21            | 22   |
| 5 wt% NaCl-CH <sub>4</sub> -montmorillonite coated quartz               | 23                                   | 23            | 22            | 23   |
| 5 wt% MgCl <sub>2</sub> -CH <sub>4</sub> -kaolinite coated quartz       | 25                                   | 23            | 24            | 24   |
| 5 wt% MgCl <sub>2</sub> -CH <sub>4</sub> -montmorillonite coated quartz | 24                                   | 24            | 24            | 24   |
